# Supplementary material for: 6-endo or not 6-endo, that is the question: correcting an erroneous structural assignment and mechanistic presumption
Source: Royal Society of Chemistry journal article supplement (doi:10.1039/b418256a), 2005-01-01

## Supporting Information

TITLE: 6-Endo Or Not 6-Endo: That is the Question

AUTHOR: John Tamine and Chenbo Wang

Contents:

(1) Cartesian coordinates from 6-31G\* optimization, Hartree-Fock 6-31G\* energy in a.u. (Hartrees), and MP2/6-31G\* energy in a.u. (Hartrees), for:

each conformation of compound 6,

beginning with conformation C, (minima)  
followed by the seven intermediate conformations for the first ring inversion,  
followed by conformation A. (minima)  
followed by the seven intermediate conformations for the second ring inversion,  
followed by conformation B. (minima)  
finally the data for conformation D. (minima)

(barriers to conformation D were not determined due to its high relative energy)

(2) <sup>1</sup>H and <sup>13</sup>C NMR, and HRMS spectra of synthesized compounds.

C-A-B\_PROF.1 (6-C)

|      |       | Cartesian Coordinates (Angstroms) |            |            |
|------|-------|-----------------------------------|------------|------------|
| Atom | Label | X                                 | Y          | Z          |
| O    | O2    | -2.1086202                        | -1.5417334 | -2.0895777 |
| C    | C1    | -1.4539528                        | -0.9895998 | -1.2863928 |
| C    | C6    | -0.0791656                        | -1.4982815 | -0.8067395 |
| C    | C2    | 0.8988588                         | -0.3301696 | -0.6423896 |
| H    | H1    | 1.8146171                         | -0.6983178 | -0.2005730 |
| C    | C4    | 0.3305260                         | 0.8546231  | 0.1761810  |
| C1   | C11   | 0.6244717                         | 2.3764760  | -0.7787648 |
| C    | C5    | 1.0212659                         | 1.0225921  | 1.5267698  |
| H    | H6    | 2.0765027                         | 1.2206394  | 1.3905707  |
| H    | H7    | 0.9112319                         | 0.1167282  | 2.1123545  |
| H    | H8    | 0.5900696                         | 1.8490602  | 2.0792189  |
| C    | C3    | -1.1774960                        | 0.7091258  | 0.3767554  |
| H    | H3    | -1.3727552                        | 0.0856232  | 1.2371253  |
| H    | H4    | -1.6372802                        | 1.6687320  | 0.5376344  |
| O    | O1    | -1.8310157                        | 0.1636699  | -0.7518651 |
| H    | H5    | 1.1347182                         | 0.0014803  | -1.6422464 |
| C1   | C12   | 0.5907822                         | -2.6378612 | -1.9817151 |
| C1   | C13   | -0.3327585                        | -2.3727867 | 0.7436544  |

E(HF) = -1759.4457851 a.u.  
E(MP2) = -1760.9715055 a.u.

## C-A-B\_PROF.2

| Atom Label |     | Cartesian Coordinates (Angstroms) |            |            |
|------------|-----|-----------------------------------|------------|------------|
|            |     | X                                 | Y          | Z          |
| O          | O2  | -2.1198870                        | -1.6755632 | -1.9640275 |
| C          | C1  | -1.4466433                        | -1.0543751 | -1.2296722 |
| C          | C6  | -0.0417379                        | -1.4894922 | -0.7770052 |
| C          | C2  | 0.8831527                         | -0.2710152 | -0.7017315 |
| H          | H1  | 1.8603440                         | -0.5807843 | -0.3576317 |
| C          | C4  | 0.3344715                         | 0.8794127  | 0.1732615  |
| Cl         | Cl1 | 0.7338058                         | 2.4373823  | -0.6735422 |
| C          | C5  | 0.9962849                         | 0.9205135  | 1.5496641  |
| H          | H6  | 2.0611513                         | 1.0868124  | 1.4503425  |
| H          | H7  | 0.8372341                         | -0.0150713 | 2.0693576  |
| H          | H8  | 0.5846733                         | 1.7251322  | 2.1486222  |
| C          | C3  | -1.1899034                        | 0.7702520  | 0.3186880  |
| H          | H3  | -1.4359146                        | 0.2756016  | 1.2483547  |
| H          | H4  | -1.6329207                        | 1.7508091  | 0.3524354  |
| O          | O1  | -1.8298423                        | 0.1259369  | -0.7631041 |
| H          | H5  | 0.9930126                         | 0.0712609  | -1.7210111 |
| Cl         | Cl2 | 0.6382123                         | -2.6445893 | -1.9313201 |
| Cl         | Cl3 | -0.2254933                        | -2.3122230 | 0.8083200  |

E(HF) = -1759.4447073 a.u.

E(MP2) = -1760.9704675 a.u.

## C-A-B\_PROF.3

| Atom Label |     | Cartesian Coordinates (Angstroms) |            |            |
|------------|-----|-----------------------------------|------------|------------|
|            |     | X                                 | Y          | Z          |
| O          | O2  | -2.1286909                        | -1.7792391 | -1.8492831 |
| C          | C1  | -1.4419368                        | -1.1103572 | -1.1710834 |
| C          | C6  | -0.0074959                        | -1.4849125 | -0.7698592 |
| C          | C2  | 0.8715675                         | -0.2308915 | -0.7360481 |
| H          | H1  | 1.8798060                         | -0.5006807 | -0.4540761 |
| C          | C4  | 0.3357905                         | 0.8929606  | 0.1769827  |
| Cl         | Cl1 | 0.8161137                         | 2.4681376  | -0.5898363 |
| C          | C5  | 0.9731554                         | 0.8481726  | 1.5662721  |
| H          | H6  | 2.0468565                         | 0.9620961  | 1.4901000  |
| H          | H7  | 0.7553642                         | -0.0901269 | 2.0544691  |
| H          | H8  | 0.5942989                         | 1.6550543  | 2.1837521  |
| C          | C3  | -1.2006439                        | 0.8222452  | 0.2789414  |
| H          | H3  | -1.4917160                        | 0.4753992  | 1.2617342  |
| H          | H4  | -1.6183016                        | 1.8088915  | 0.1730222  |
| O          | O1  | -1.8448837                        | 0.0712846  | -0.7289419 |
| H          | H5  | 0.9047720                         | 0.1217391  | -1.7578110 |
| Cl         | Cl2 | 0.6762130                         | -2.6167473 | -1.9460630 |
| Cl         | Cl3 | -0.1202688                        | -2.3130256 | 0.8177284  |

E(HF) = -1759.4419032 a.u.

E(MP2) = -1760.9675999 a.u.

## C-A-B\_PROF.4

| Atom Label |     | Cartesian Coordinates (Angstroms) |            |            |
|------------|-----|-----------------------------------|------------|------------|
|            |     | X                                 | Y          | Z          |
| O          | O2  | -2.1617909                        | -1.9519914 | -1.5682424 |
| C          | C1  | -1.4383050                        | -1.1924869 | -1.0394305 |
| C          | C6  | 0.0482359                         | -1.4821928 | -0.7809800 |
| C          | C2  | 0.8645523                         | -0.1873845 | -0.7734008 |
| H          | H1  | 1.9013675                         | -0.4102681 | -0.5637915 |
| C          | C4  | 0.3431365                         | 0.8960635  | 0.1873473  |
| Cl         | Cl1 | 0.9483646                         | 2.4816198  | -0.4696323 |
| C          | C5  | 0.9088931                         | 0.7675883  | 1.6029084  |
| H          | H6  | 1.9910863                         | 0.7587464  | 1.5791688  |
| H          | H7  | 0.5625789                         | -0.1378573 | 2.0766821  |
| H          | H8  | 0.5933842                         | 1.6111030  | 2.2060296  |
| C          | C3  | -1.2026553                        | 0.9145338  | 0.2042693  |
| H          | H3  | -1.5648480                        | 0.7708282  | 1.2134557  |
| H          | H4  | -1.5628735                        | 1.8756858  | -0.1183364 |
| O          | O1  | -1.8551733                        | 0.0048395  | -0.6623957 |
| H          | H5  | 0.8121791                         | 0.1902289  | -1.7858399 |
| Cl         | Cl2 | 0.6814092                         | -2.5221982 | -2.0705542 |
| Cl         | Cl3 | 0.1304586                         | -2.3868578 | 0.7627428  |

E(HF) = -1759.4381871 a.u.

E(MP2) = -1760.9635797 a.u.

## C-A-B\_PROF.5

| Atom Label |     | Cartesian Coordinates (Angstroms) |            |            |
|------------|-----|-----------------------------------|------------|------------|
|            |     | X                                 | Y          | Z          |
| O          | O2  | -2.1645712                        | -1.8897275 | -1.5859943 |
| C          | C1  | -1.4370532                        | -1.2192265 | -0.9524113 |
| C          | C6  | 0.0680062                         | -1.4930971 | -0.8210699 |
| C          | C2  | 0.8628776                         | -0.1892571 | -0.7889988 |
| H          | H1  | 1.9069253                         | -0.4012688 | -0.6050103 |
| C          | C4  | 0.3456252                         | 0.8572497  | 0.2068644  |
| Cl         | Cl1 | 0.9982435                         | 2.4575989  | -0.4031050 |
| C          | C5  | 0.8733229                         | 0.7429617  | 1.6371791  |
| H          | H6  | 1.9530236                         | 0.6660139  | 1.6429332  |
| H          | H7  | 0.4618277                         | -0.1272476 | 2.1306185  |
| H          | H8  | 0.5897277                         | 1.6222696  | 2.2005651  |
| C          | C3  | -1.1920686                        | 0.9746648  | 0.1761036  |
| H          | H3  | -1.5664266                        | 1.1374993  | 1.1737220  |
| H          | H4  | -1.5173970                        | 1.7595976  | -0.4849508 |
| O          | O1  | -1.8830131                        | -0.2095830 | -0.2232349 |
| H          | H5  | 0.7878885                         | 0.2235946  | -1.7866384 |
| Cl         | Cl2 | 0.6378366                         | -2.4575244 | -2.1932063 |
| Cl         | Cl3 | 0.2752251                         | -2.4545179 | 0.6766343  |

E(HF) = -1759.4377441 a.u.

E(MP2) = -1760.9625838 a.u.

## C-A-B\_PROF.6

| Atom Label |     | Cartesian Coordinates (Angstroms) |            |            |
|------------|-----|-----------------------------------|------------|------------|
|            |     | X                                 | Y          | Z          |
| O          | O2  | -2.1983263                        | -1.8908812 | -1.4405751 |
| C          | C1  | -1.4320591                        | -1.2322920 | -0.8432557 |
| C          | C6  | 0.0852676                         | -1.4819215 | -0.8384077 |
| C          | C2  | 0.8711301                         | -0.1695119 | -0.8005932 |
| H          | H1  | 1.9192974                         | -0.3773788 | -0.6363239 |
| C          | C4  | 0.3546285                         | 0.8590321  | 0.2138129  |
| Cl         | Cl1 | 1.0354649                         | 2.4660237  | -0.3414324 |
| C          | C5  | 0.8249712                         | 0.7074637  | 1.6587980  |
| H          | H6  | 1.9001852                         | 0.5906470  | 1.7042121  |
| H          | H7  | 0.3644475                         | -0.1550841 | 2.1227924  |
| H          | H8  | 0.5501704                         | 1.5883145  | 2.2234234  |
| C          | C3  | -1.1698046                        | 0.9993111  | 0.1202541  |
| H          | H3  | -1.5744180                        | 1.3466923  | 1.0561816  |
| H          | H4  | -1.4707437                        | 1.6321149  | -0.6995592 |
| O          | O1  | -1.8216326                        | -0.2643995 | -0.0208750 |
| H          | H5  | 0.7775717                         | 0.2615312  | -1.7889553 |
| Cl         | Cl2 | 0.5658780                         | -2.3802866 | -2.2881166 |
| Cl         | Cl3 | 0.4179719                         | -2.4993748 | 0.5986197  |

E(HF) = -1759.4414988 a.u.

E(MP2) = -1760.9663351 a.u.

## C-A-B\_PROF.7

| Atom Label |     | Cartesian Coordinates (Angstroms) |            |            |
|------------|-----|-----------------------------------|------------|------------|
|            |     | X                                 | Y          | Z          |
| O          | O2  | -2.2116665                        | -1.9609326 | -1.2237806 |
| C          | C1  | -1.4232397                        | -1.2486328 | -0.7262984 |
| C          | C6  | 0.0998797                         | -1.4559155 | -0.8445988 |
| C          | C2  | 0.8814890                         | -0.1369574 | -0.8135114 |
| H          | H1  | 1.9323923                         | -0.3437459 | -0.6666797 |
| C          | C4  | 0.3662917                         | 0.8782350  | 0.2147280  |
| Cl         | Cl1 | 1.0753783                         | 2.4853743  | -0.2731472 |
| C          | C5  | 0.7727442                         | 0.6559147  | 1.6688157  |
| H          | H6  | 1.8411417                         | 0.5022638  | 1.7523064  |
| H          | H7  | 0.2665442                         | -0.2073851 | 2.0794466  |
| H          | H8  | 0.5029265                         | 1.5229983  | 2.2572736  |
| C          | C3  | -1.1457684                        | 1.0213604  | 0.0612185  |
| H          | H3  | -1.5766853                        | 1.5237765  | 0.9112793  |
| H          | H4  | -1.4092011                        | 1.5308100  | -0.8545632 |
| O          | O1  | -1.7795116                        | -0.2548949 | 0.0846167  |
| H          | H5  | 0.7717574                         | 0.3049471  | -1.7953242 |
| Cl         | Cl2 | 0.4816111                         | -2.2985114 | -2.3575520 |
| Cl         | Cl3 | 0.5539166                         | -2.5187044 | 0.5257709  |

E(HF) = -1759.4450123 a.u.

E(MP2) = -1760.9702929 a.u.

## C-A-B\_PROF.8 (6-A)

| Atom Label |     | Cartesian Coordinates (Angstroms) |            |            |
|------------|-----|-----------------------------------|------------|------------|
|            |     | X                                 | Y          | Z          |
| O          | O2  | -2.2013718                        | -2.0414329 | -0.9889147 |
| C          | C1  | -1.4124895                        | -1.2598165 | -0.6109570 |
| C          | C6  | 0.1079245                         | -1.4252410 | -0.8454642 |
| C          | C2  | 0.8944570                         | -0.1043203 | -0.8194286 |
| H          | H1  | 1.9448842                         | -0.3164654 | -0.6777746 |
| C          | C4  | 0.3758261                         | 0.9019373  | 0.2164011  |
| Cl         | Cl1 | 1.1080955                         | 2.5062956  | -0.2064058 |
| C          | C5  | 0.7250711                         | 0.6037469  | 1.6713268  |
| H          | H6  | 1.7879937                         | 0.4328693  | 1.7849741  |
| H          | H7  | 0.1945911                         | -0.2703433 | 2.0212975  |
| H          | H8  | 0.4444934                         | 1.4441982  | 2.2934065  |
| C          | C3  | -1.1256833                        | 1.0390857  | 0.0051196  |
| H          | H3  | -1.5779987                        | 1.6757736  | 0.7477710  |
| H          | H4  | -1.3428307                        | 1.4373753  | -0.9777096 |
| O          | O1  | -1.7584734                        | -0.2229375 | 0.1506743  |
| H          | H5  | 0.7822009                         | 0.3451227  | -1.7970380 |
| Cl         | Cl2 | 0.3814847                         | -2.2115505 | -2.4136459 |
| Cl         | Cl3 | 0.6718253                         | -2.5342968 | 0.4463678  |

E(HF) = -1759.4463559 a.u.

E(MP2) = -1760.9723128 a.u.

## C-A-B\_PROF.9

| Atom Label |     | Cartesian Coordinates (Angstroms) |            |            |
|------------|-----|-----------------------------------|------------|------------|
|            |     | X                                 | Y          | Z          |
| O          | O2  | -2.1393268                        | -2.1740156 | -0.6258256 |
| C          | C1  | -1.3933820                        | -1.2806604 | -0.4726292 |
| C          | C6  | 0.1059097                         | -1.4027969 | -0.8549849 |
| C          | C2  | 0.9248516                         | -0.0957058 | -0.8123800 |
| H          | H1  | 1.9551355                         | -0.3296314 | -0.5876390 |
| C          | C4  | 0.3791037                         | 0.9127548  | 0.2048898  |
| Cl         | Cl1 | 1.1554328                         | 2.5078140  | -0.1590583 |
| C          | C5  | 0.6626190                         | 0.5744914  | 1.6652283  |
| H          | H6  | 1.7241394                         | 0.4344909  | 1.8250878  |
| H          | H7  | 0.1493282                         | -0.3318548 | 1.9576154  |
| H          | H8  | 0.3221654                         | 1.3791021  | 2.3048745  |
| C          | C3  | -1.1068942                        | 1.0798444  | -0.0687865 |
| H          | H3  | -1.5686969                        | 1.7625815  | 0.6256407  |
| H          | H4  | -1.2756504                        | 1.4365850  | -1.0767439 |
| O          | O1  | -1.7792531                        | -0.1544337 | 0.1134570  |
| H          | H5  | 0.8814476                         | 0.3574957  | -1.7915411 |
| Cl         | Cl2 | 0.1905457                         | -2.0655027 | -2.5085986 |
| Cl         | Cl3 | 0.8125248                         | -2.6105583 | 0.2613939  |

E(HF) = -1759.4454179 a.u.

E(MP2) = -1760.9717095 a.u.

## C-A-B\_PROF.10

| Atom Label |     | Cartesian Coordinates (Angstroms) |            |            |
|------------|-----|-----------------------------------|------------|------------|
|            |     | X                                 | Y          | Z          |
| O          | O2  | -2.0052168                        | -2.2540713 | -0.1868741 |
| C          | C1  | -1.3383605                        | -1.2948333 | -0.3095535 |
| C          | C6  | 0.1093871                         | -1.3882455 | -0.8662771 |
| C          | C2  | 0.9630754                         | -0.0972010 | -0.7903419 |
| H          | H1  | 1.9739730                         | -0.3510626 | -0.5096897 |
| C          | C4  | 0.3812184                         | 0.9163705  | 0.1967397  |
| Cl         | Cl1 | 1.1983230                         | 2.5011049  | -0.1058230 |
| C          | C5  | 0.5863154                         | 0.5482651  | 1.6633904  |
| H          | H6  | 1.6416801                         | 0.4464061  | 1.8816321  |
| H          | H7  | 0.0994235                         | -0.3891629 | 1.9031865  |
| H          | H8  | 0.1745161                         | 1.3164281  | 2.3058247  |
| C          | C3  | -1.0844993                        | 1.1077653  | -0.1595097 |
| H          | H3  | -1.5634714                        | 1.8275427  | 0.4842317  |
| H          | H4  | -1.1901870                        | 1.4291440  | -1.1875355 |
| O          | O1  | -1.7962469                        | -0.1010126 | 0.0332067  |
| H          | H5  | 0.9873423                         | 0.3568791  | -1.7685444 |
| Cl         | Cl2 | -0.0671637                        | -1.8628624 | -2.5850785 |
| Cl         | Cl3 | 0.9298913                         | -2.7114543 | 0.0010159  |

E(HF) = -1759.4439532 a.u.

E(MP2) = -1760.9704582 a.u.

## C-A-B\_PROF.11

| Atom Label |     | Cartesian Coordinates (Angstroms) |            |            |
|------------|-----|-----------------------------------|------------|------------|
|            |     | X                                 | Y          | Z          |
| O          | O2  | -1.8588614                        | -2.2799324 | 0.1330380  |
| C          | C1  | -1.2761184                        | -1.3124547 | -0.1898866 |
| C          | C6  | 0.0992825                         | -1.3786657 | -0.9054277 |
| C          | C2  | 1.0071649                         | -0.1273479 | -0.7372740 |
| H          | H1  | 1.9788649                         | -0.4297250 | -0.3779505 |
| C          | C4  | 0.3816308                         | 0.9131075  | 0.1931026  |
| Cl         | Cl1 | 1.2049195                         | 2.4939710  | -0.1072314 |
| C          | C5  | 0.5316757                         | 0.5726743  | 1.6738453  |
| H          | H6  | 1.5798379                         | 0.5240133  | 1.9397469  |
| H          | H7  | 0.0812709                         | -0.3857002 | 1.9056473  |
| H          | H8  | 0.0549498                         | 1.3259504  | 2.2884335  |
| C          | C3  | -1.0708549                        | 1.0888549  | -0.2263700 |
| H          | H3  | -1.5682232                        | 1.8443974  | 0.3597303  |
| H          | H4  | -1.1389345                        | 1.3515608  | -1.2738911 |
| O          | O1  | -1.7875213                        | -0.1083144 | 0.0140307  |
| H          | H5  | 1.1485025                         | 0.3200505  | -1.7082714 |
| Cl         | Cl2 | -0.3182121                        | -1.5830264 | -2.6412235 |
| Cl         | Cl3 | 0.9506266                         | -2.8294134 | -0.3400484 |

E(HF) = -1759.4435542 a.u.

E(MP2) = -1760.9700600 a.u.

## C-A-B\_PROF.12

| Atom Label |     | Cartesian Coordinates (Angstroms) |            |            |
|------------|-----|-----------------------------------|------------|------------|
|            |     | X                                 | Y          | Z          |
| O          | O2  | -1.7594601                        | -2.3189409 | 0.2548275  |
| C          | C1  | -1.2366785                        | -1.3457677 | -0.1443727 |
| C          | C6  | 0.0808933                         | -1.3692889 | -0.9568452 |
| C          | C2  | 1.0382348                         | -0.1772839 | -0.6732564 |
| H          | H1  | 1.9381652                         | -0.5437034 | -0.2029791 |
| C          | C4  | 0.3794026                         | 0.9090489  | 0.1860058  |
| Cl         | Cl1 | 1.1845759                         | 2.4873177  | -0.1725605 |
| C          | C5  | 0.5133950                         | 0.6386757  | 1.6833668  |
| H          | H6  | 1.5580360                         | 0.6287046  | 1.9670842  |
| H          | H7  | 0.0826573                         | -0.3204965 | 1.9477263  |
| H          | H8  | 0.0080084                         | 1.4050231  | 2.2575807  |
| C          | C3  | -1.0739622                        | 1.0480306  | -0.2475063 |
| H          | H3  | -1.5804255                        | 1.8214528  | 0.3062923  |
| H          | H4  | -1.1460759                        | 1.2635237  | -1.3046432 |
| O          | O1  | -1.7698460                        | -0.1489338 | 0.0527127  |
| H          | H5  | 1.3296419                         | 0.2431680  | -1.6226369 |
| Cl         | Cl2 | -0.4608156                        | -1.3180529 | -2.6719734 |
| Cl         | Cl3 | 0.9142534                         | -2.9024773 | -0.6588222 |

E(HF) = -1759.4443639 a.u.

E(MP2) = -1760.9709573 a.u.

## C-A-B\_PROF.13

| Atom Label |     | Cartesian Coordinates (Angstroms) |            |            |
|------------|-----|-----------------------------------|------------|------------|
|            |     | X                                 | Y          | Z          |
| O          | O2  | -1.7164921                        | -2.3814173 | 0.2359568  |
| C          | C1  | -1.2215094                        | -1.3909725 | -0.1561028 |
| C          | C6  | 0.0644566                         | -1.3611837 | -1.0104831 |
| C          | C2  | 1.0524769                         | -0.2377991 | -0.6056906 |
| H          | H1  | 1.8404821                         | -0.6708638 | -0.0074309 |
| C          | C4  | 0.3743628                         | 0.9050529  | 0.1749032  |
| Cl         | Cl1 | 1.1467825                         | 2.4743357  | -0.2842740 |
| C          | C5  | 0.5257318                         | 0.7281315  | 1.6849552  |
| H          | H6  | 1.5729332                         | 0.7343169  | 1.9597392  |
| H          | H7  | 0.0951069                         | -0.2141638 | 2.0052844  |
| H          | H8  | 0.0259017                         | 1.5277464  | 2.2170705  |
| C          | C3  | -1.0910897                        | 1.0050078  | -0.2311635 |
| H          | H3  | -1.5987416                        | 1.7724364  | 0.3297767  |
| H          | H4  | -1.1967108                        | 1.2103412  | -1.2857063 |
| O          | O1  | -1.7526241                        | -0.2040988 | 0.1018708  |
| H          | H5  | 1.5097439                         | 0.1362477  | -1.5078516 |
| Cl         | Cl2 | -0.5068006                        | -1.1027954 | -2.6979099 |
| Cl         | Cl3 | 0.8759901                         | -2.9303221 | -0.9229440 |

E(HF) = -1759.4452271 a.u.

E(MP2) = -1760.9717444 a.u.

## C-A-B\_PROF.14

| Atom Label |     | Cartesian Coordinates (Angstroms) |            |            |
|------------|-----|-----------------------------------|------------|------------|
|            |     | X                                 | Y          | Z          |
| O          | O2  | -1.7574838                        | -2.4830057 | 0.0126471  |
| C          | C1  | -1.2380713                        | -1.4631402 | -0.2511612 |
| C          | C6  | 0.0530959                         | -1.3506844 | -1.0873249 |
| C          | C2  | 1.0422216                         | -0.3257681 | -0.4986139 |
| H          | H1  | 1.6396129                         | -0.8453859 | 0.2375203  |
| C          | C4  | 0.3629754                         | 0.8945949  | 0.1698515  |
| Cl         | Cl1 | 1.0650498                         | 2.4288905  | -0.4873187 |
| C          | C5  | 0.5872706                         | 0.8831301  | 1.6809423  |
| H          | H6  | 1.6459567                         | 0.8826802  | 1.9086081  |
| H          | H7  | 0.1406779                         | -0.0059216 | 2.1137681  |
| H          | H8  | 0.1372664                         | 1.7530462  | 2.1427719  |
| C          | C3  | -1.1272868                        | 0.9332823  | -0.1588183 |
| H          | H3  | -1.6330565                        | 1.6676788  | 0.4464557  |
| H          | H4  | -1.3013342                        | 1.1581212  | -1.1981355 |
| O          | O1  | -1.7247339                        | -0.3071334 | 0.1802213  |
| H          | H5  | 1.7124407                         | -0.0203546 | -1.2866450 |
| Cl         | Cl2 | -0.4519076                        | -0.8706314 | -2.7436002 |
| Cl         | Cl3 | 0.8473065                         | -2.9293991 | -1.1811686 |

E(HF) = -1759.4457210 a.u.

E(MP2) = -1760.9718143 a.u.

## C-A-B\_PROF.15 (6B)

| Atom Label |     | Cartesian Coordinates (Angstroms) |            |            |
|------------|-----|-----------------------------------|------------|------------|
|            |     | X                                 | Y          | Z          |
| O          | O2  | -2.2282889                        | -2.2247642 | -0.1655259 |
| C          | C1  | -1.4613394                        | -1.3506078 | -0.3264654 |
| C          | C6  | -0.0231930                        | -1.5507035 | -0.8464950 |
| C          | C2  | 0.9487057                         | -0.6448719 | -0.0816511 |
| C          | C4  | 0.4801755                         | 0.8225514  | 0.0619807  |
| Cl         | Cl1 | 1.5096384                         | 1.9205192  | -0.9474046 |
| C          | C5  | 0.6018258                         | 1.2739332  | 1.5158391  |
| H          | H6  | 1.6101460                         | 1.1250898  | 1.8830637  |
| H          | H7  | -0.0810358                        | 0.6960323  | 2.1304578  |
| H          | H8  | 0.3529449                         | 2.3227234  | 1.6142860  |
| C          | C3  | -0.9556121                        | 0.9876502  | -0.4445025 |
| H          | H3  | -1.4112310                        | 1.8685148  | -0.0222912 |
| H          | H4  | -0.9926379                        | 1.0598005  | -1.5183734 |
| O          | O1  | -1.7599146                        | -0.0954852 | -0.0078712 |
| H          | H2  | 1.9246925                         | -0.7049903 | -0.5379785 |
| H          | H9  | 1.0310879                         | -1.0726911 | 0.9099561  |
| Cl         | Cl2 | -0.0178595                        | -1.1979575 | -2.6032580 |
| Cl         | Cl3 | 0.4718957                         | -3.2347430 | -0.6137663 |

E(HF) = -1759.4461836 a.u.

E(MP2) = -1760.9721983 a.u.



6D

|      |       | Cartesian Coordinates (Angstroms) |            |            |
|------|-------|-----------------------------------|------------|------------|
| Atom | Label | X                                 | Y          | Z          |
| O    | O2    | -2.0128113                        | -2.6749503 | 0.0132847  |
| C    | C1    | -1.3467625                        | -1.7198489 | -0.1335853 |
| C    | C6    | 0.1915696                         | -1.7968213 | -0.2776293 |
| C    | C5    | 0.9284333                         | -0.4908276 | 0.0632851  |
| H    | H5    | 1.0576560                         | -0.4798881 | 1.1394904  |
| H    | H6    | 1.9138673                         | -0.5108340 | -0.3800448 |
| C    | C4    | 0.1804831                         | 0.7980241  | -0.2846212 |
| C    | C3    | -1.2556280                        | 0.6554530  | 0.1891579  |
| H    | H3    | -1.2680041                        | 0.6402137  | 1.2743172  |
| H    | H4    | -1.8686937                        | 1.4729567  | -0.1520418 |
| O    | O1    | -1.8842362                        | -0.5137513 | -0.2906890 |
| Cl   | Cl1   | 0.1806519                         | 1.1165314  | -2.0641874 |
| C    | C2    | 0.8457838                         | 1.9952831  | 0.3921278  |
| H    | H1    | 1.8701844                         | 2.0976957  | 0.0574824  |
| H    | H2    | 0.8466964                         | 1.8678049  | 1.4699611  |
| H    | H10   | 0.3188580                         | 2.9104900  | 0.1520549  |
| Cl   | Cl2   | 0.4927042                         | -2.2927883 | -1.9668380 |
| Cl   | Cl3   | 0.8092481                         | -3.0747426 | 0.7984750  |

E(HF) = -1759.4433497 a.u.  
E(MP2) = -1760.9689031 a.u.

Chenbo 06-02-04 Cyclization of Allyl trichloroacetate 2nd pot  
five-membered ring CDCl<sub>3</sub>

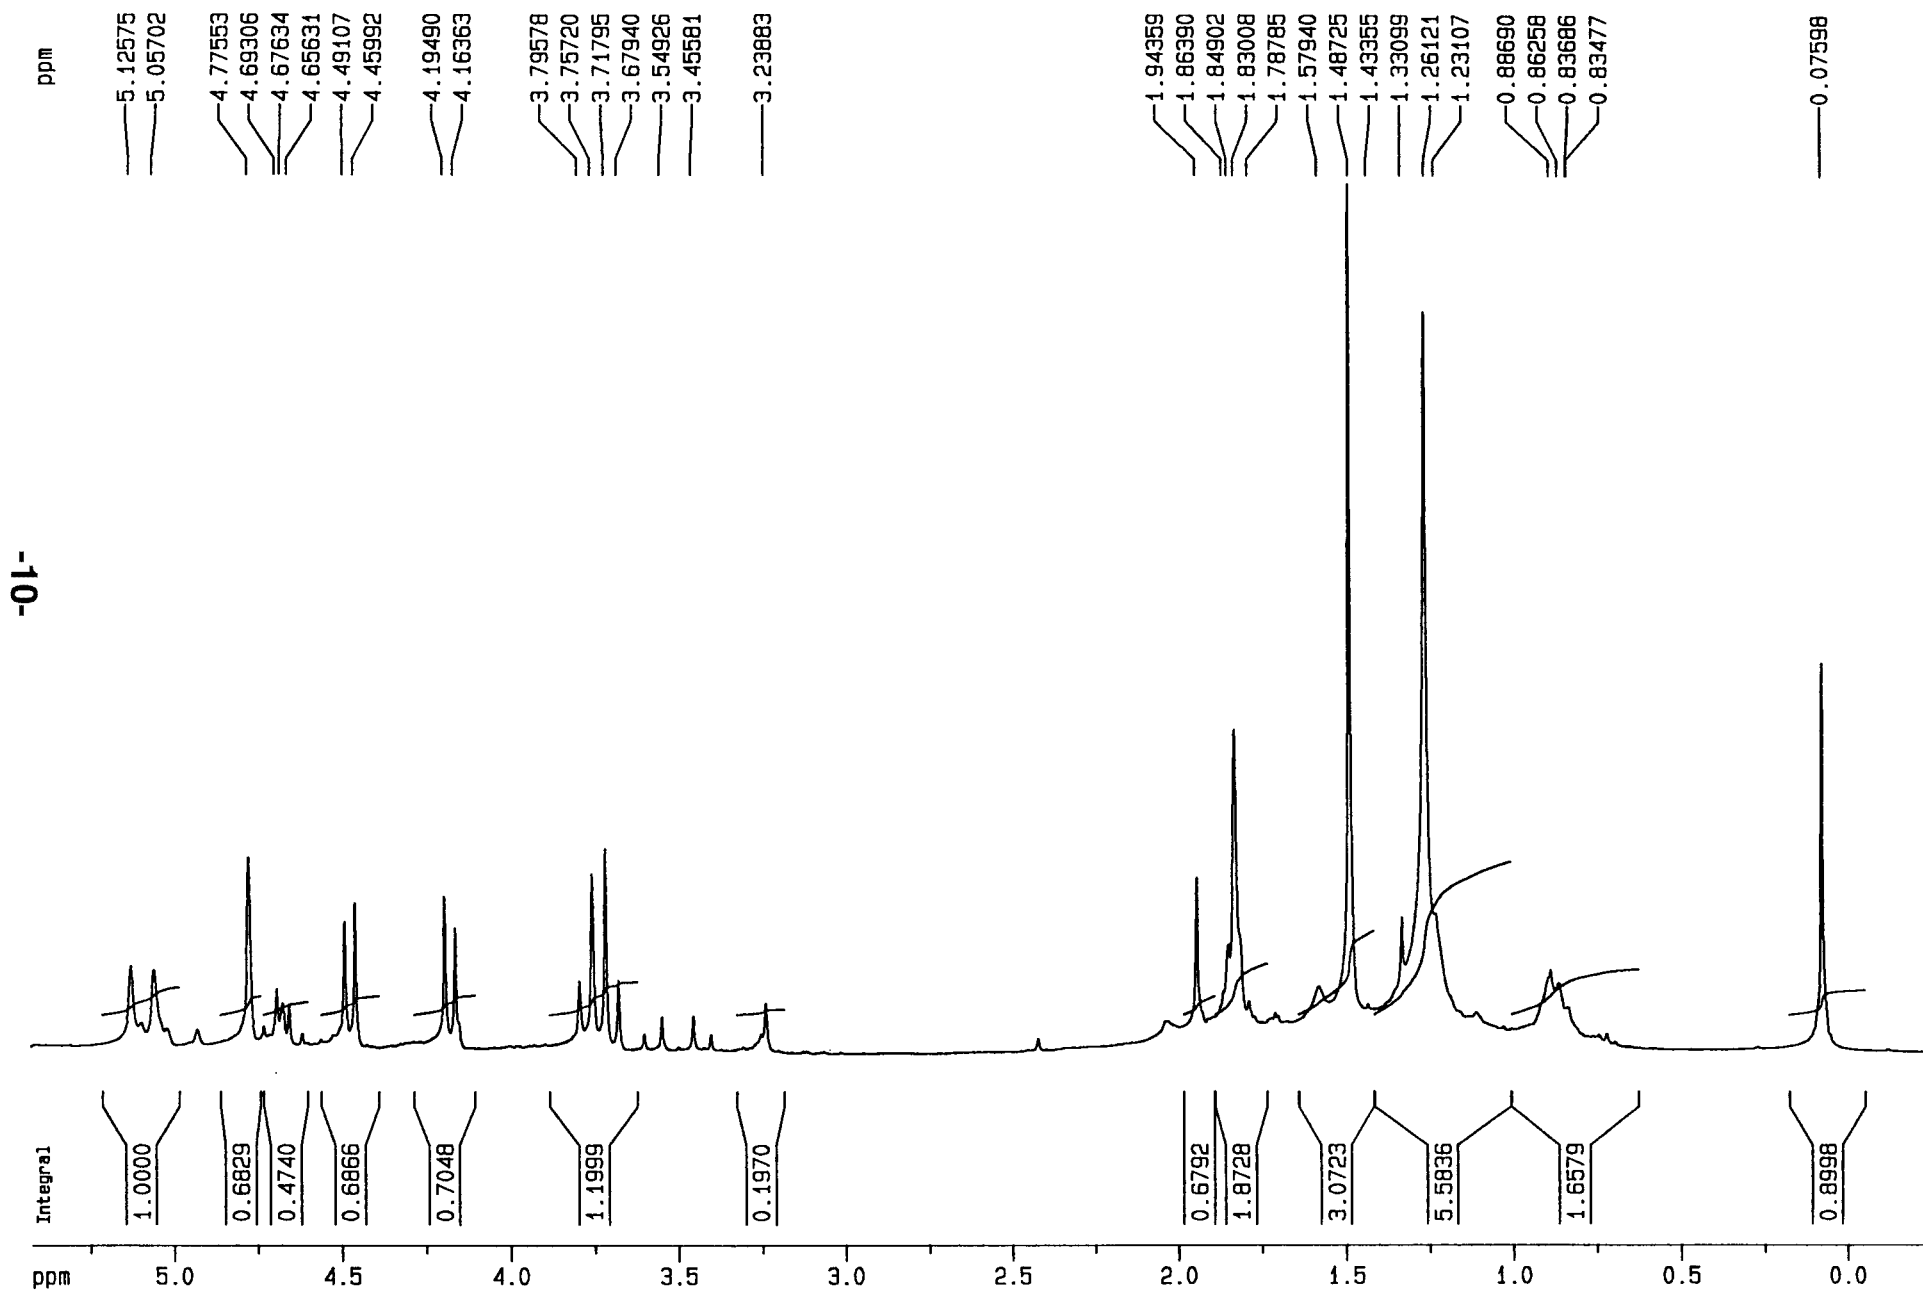

Chenbo 06-02-04 Cyclization of Allyl trichloroacetate 2nd pot  
six-membered ring mixture CDCl<sub>3</sub> 7a + 7b

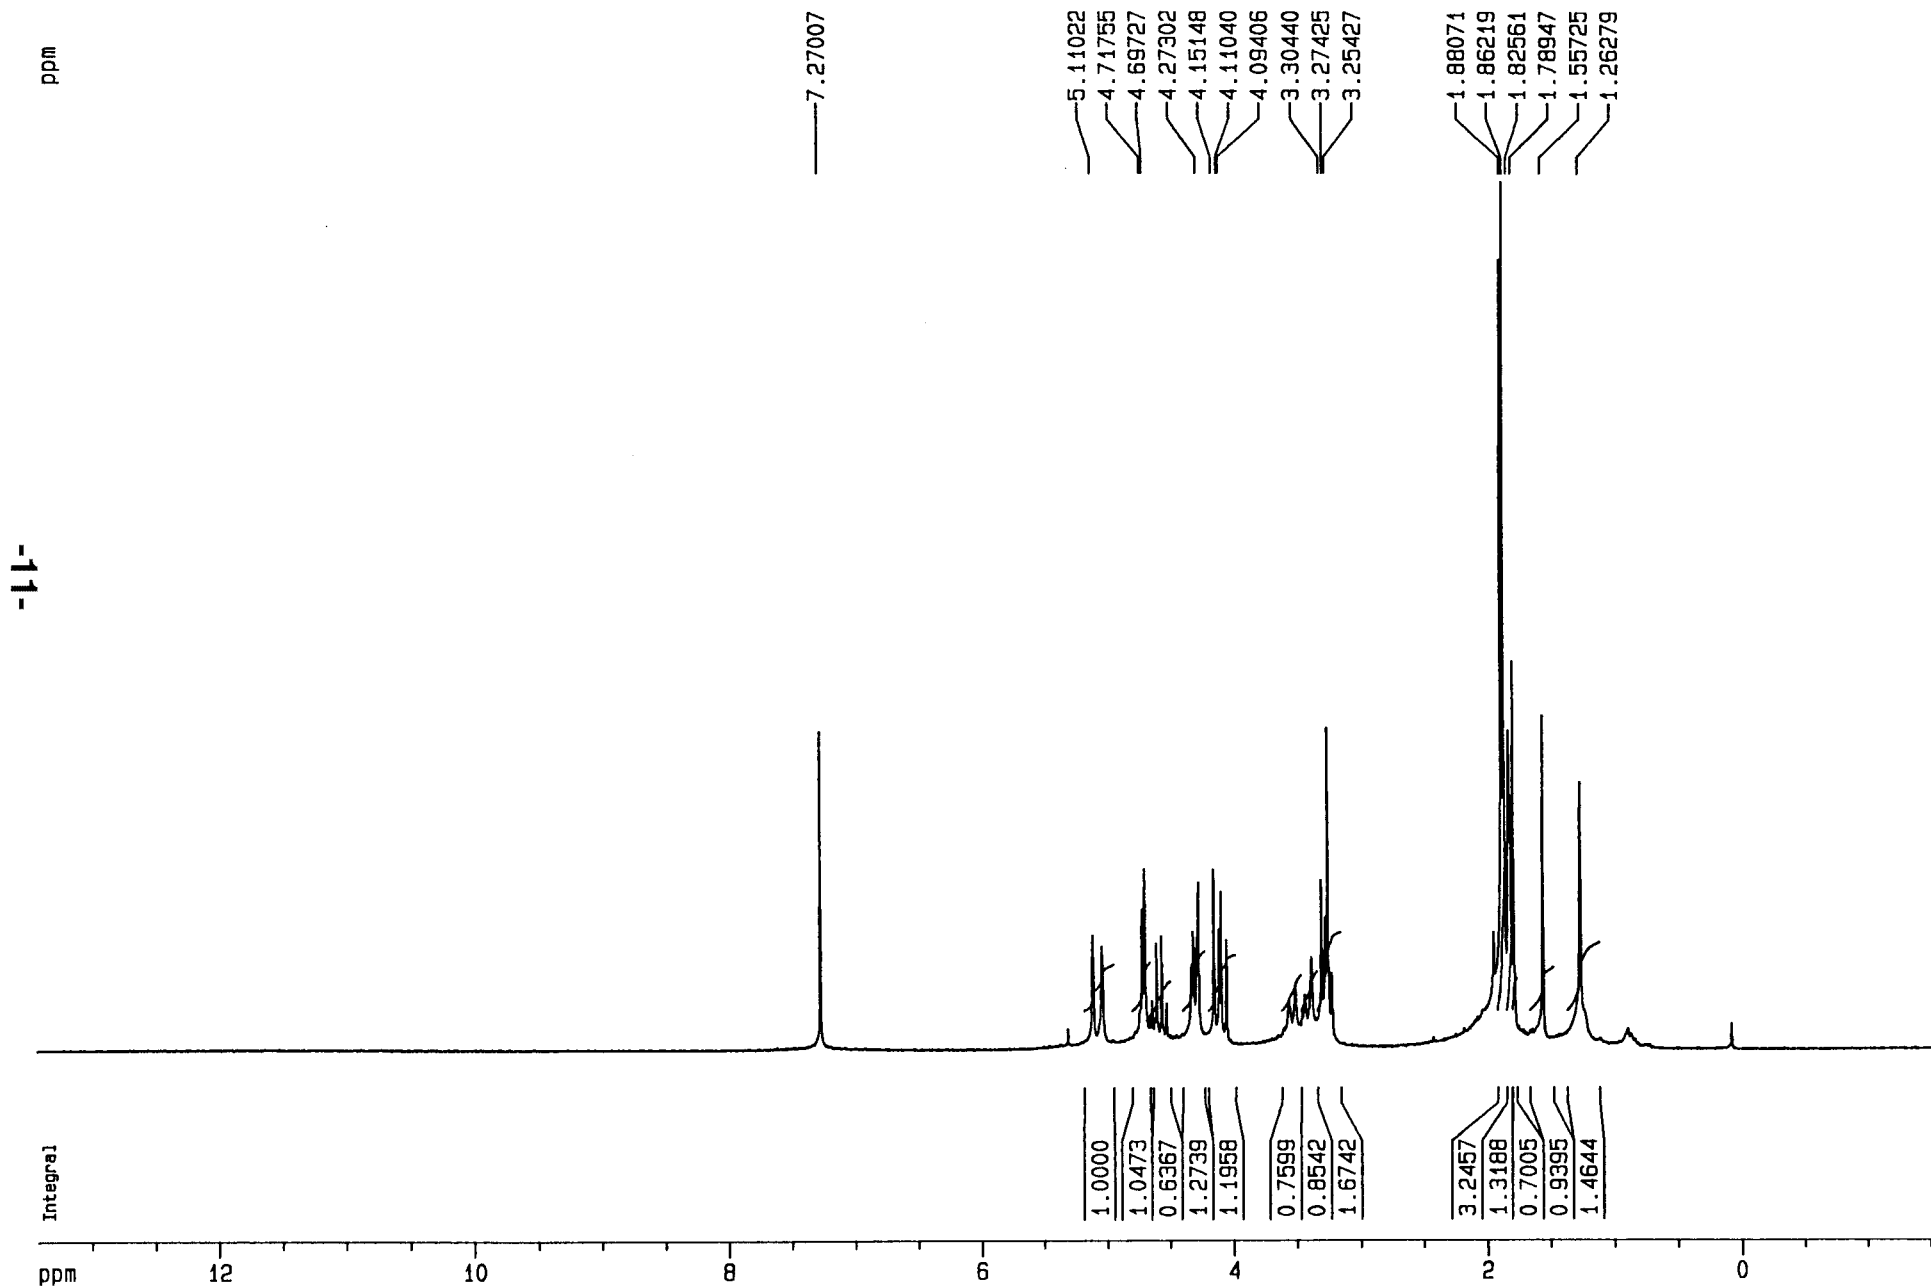

Chenbo 090904, 125 MHz, C13, cdc13, rt

Current Data Parameters  
NAME Chenbo090904  
EXPNO 2  
PROCNO 1

F2 - Acquisition Parameters  
Date\_ 500000  
Time 15.17  
INSTRUM spect  
PROBHD 5 mm TXI 13C  
PULPROG c13wznoe  
TD 32768  
SOLVENT CDC13  
NS 6282  
DS 2  
SWH 32679.738 Hz  
FIDRES 0.997306 Hz  
AQ 0.5014004 sec  
RG 32768  
DW 15.300 usec  
DE 6.00 usec  
TE 290.0 K  
D3 0.00100000 sec  
PL12 6.00 dB  
D1 10.00000000 sec  
CPDPRG2 waltz16  
PCPD2 100.00 usec  
SF02 500.1330008 MHz  
NUC2 1H  
PL2 120.00 dB  
P1 17.00 usec  
DE 6.00 usec  
SF01 125.7715724 MHz  
NUC1 13C  
PL1 0.00 dB

F2 - Processing parameters  
SI 8192  
SF 125.7577671 MHz  
WDW EM  
SSB 0  
LB 4.00 Hz  
GB 0  
PC 1.00

1D NMR plot parameters  
CX 20.00 cm  
F1P 168.836 ppm  
F1 21232.43 Hz  
F2P 12.861 ppm  
F2 1617.43 Hz  
PPMCM 7.79872 ppm/cm  
HZCM 980.75006 Hz/cm

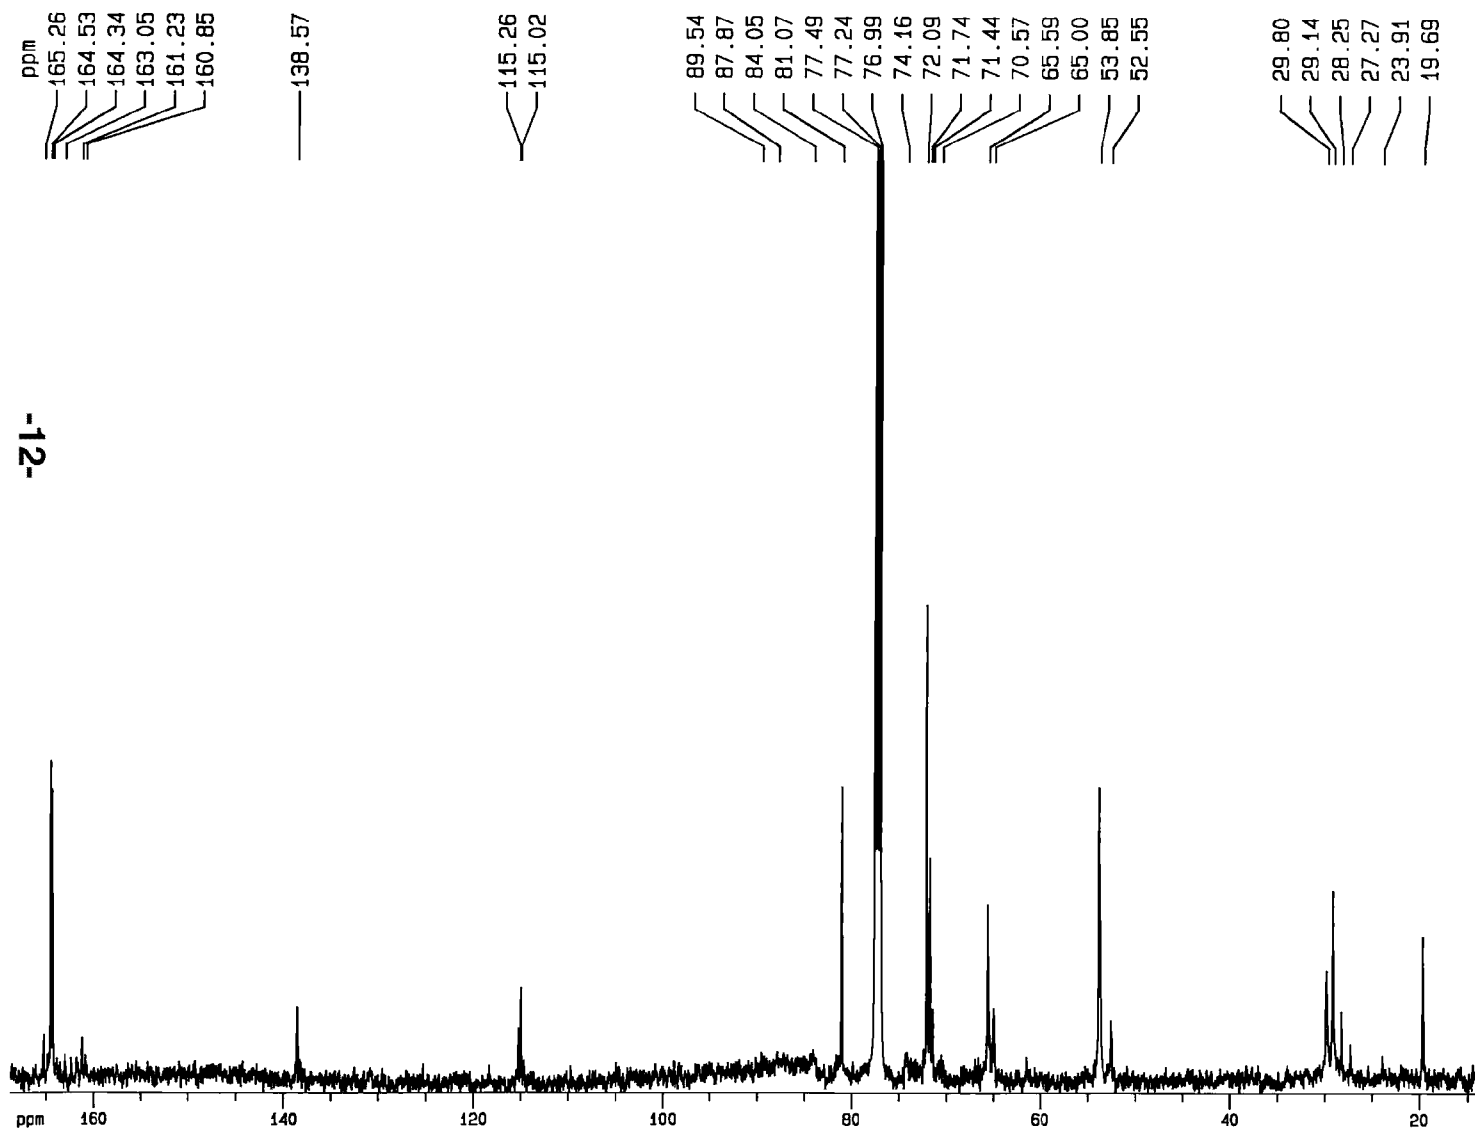

Chenbo 06-02-04 Cyclization of Allyl trichloroacetate 2nd pot  
six-membered ring high Rf CDC13 *7a*

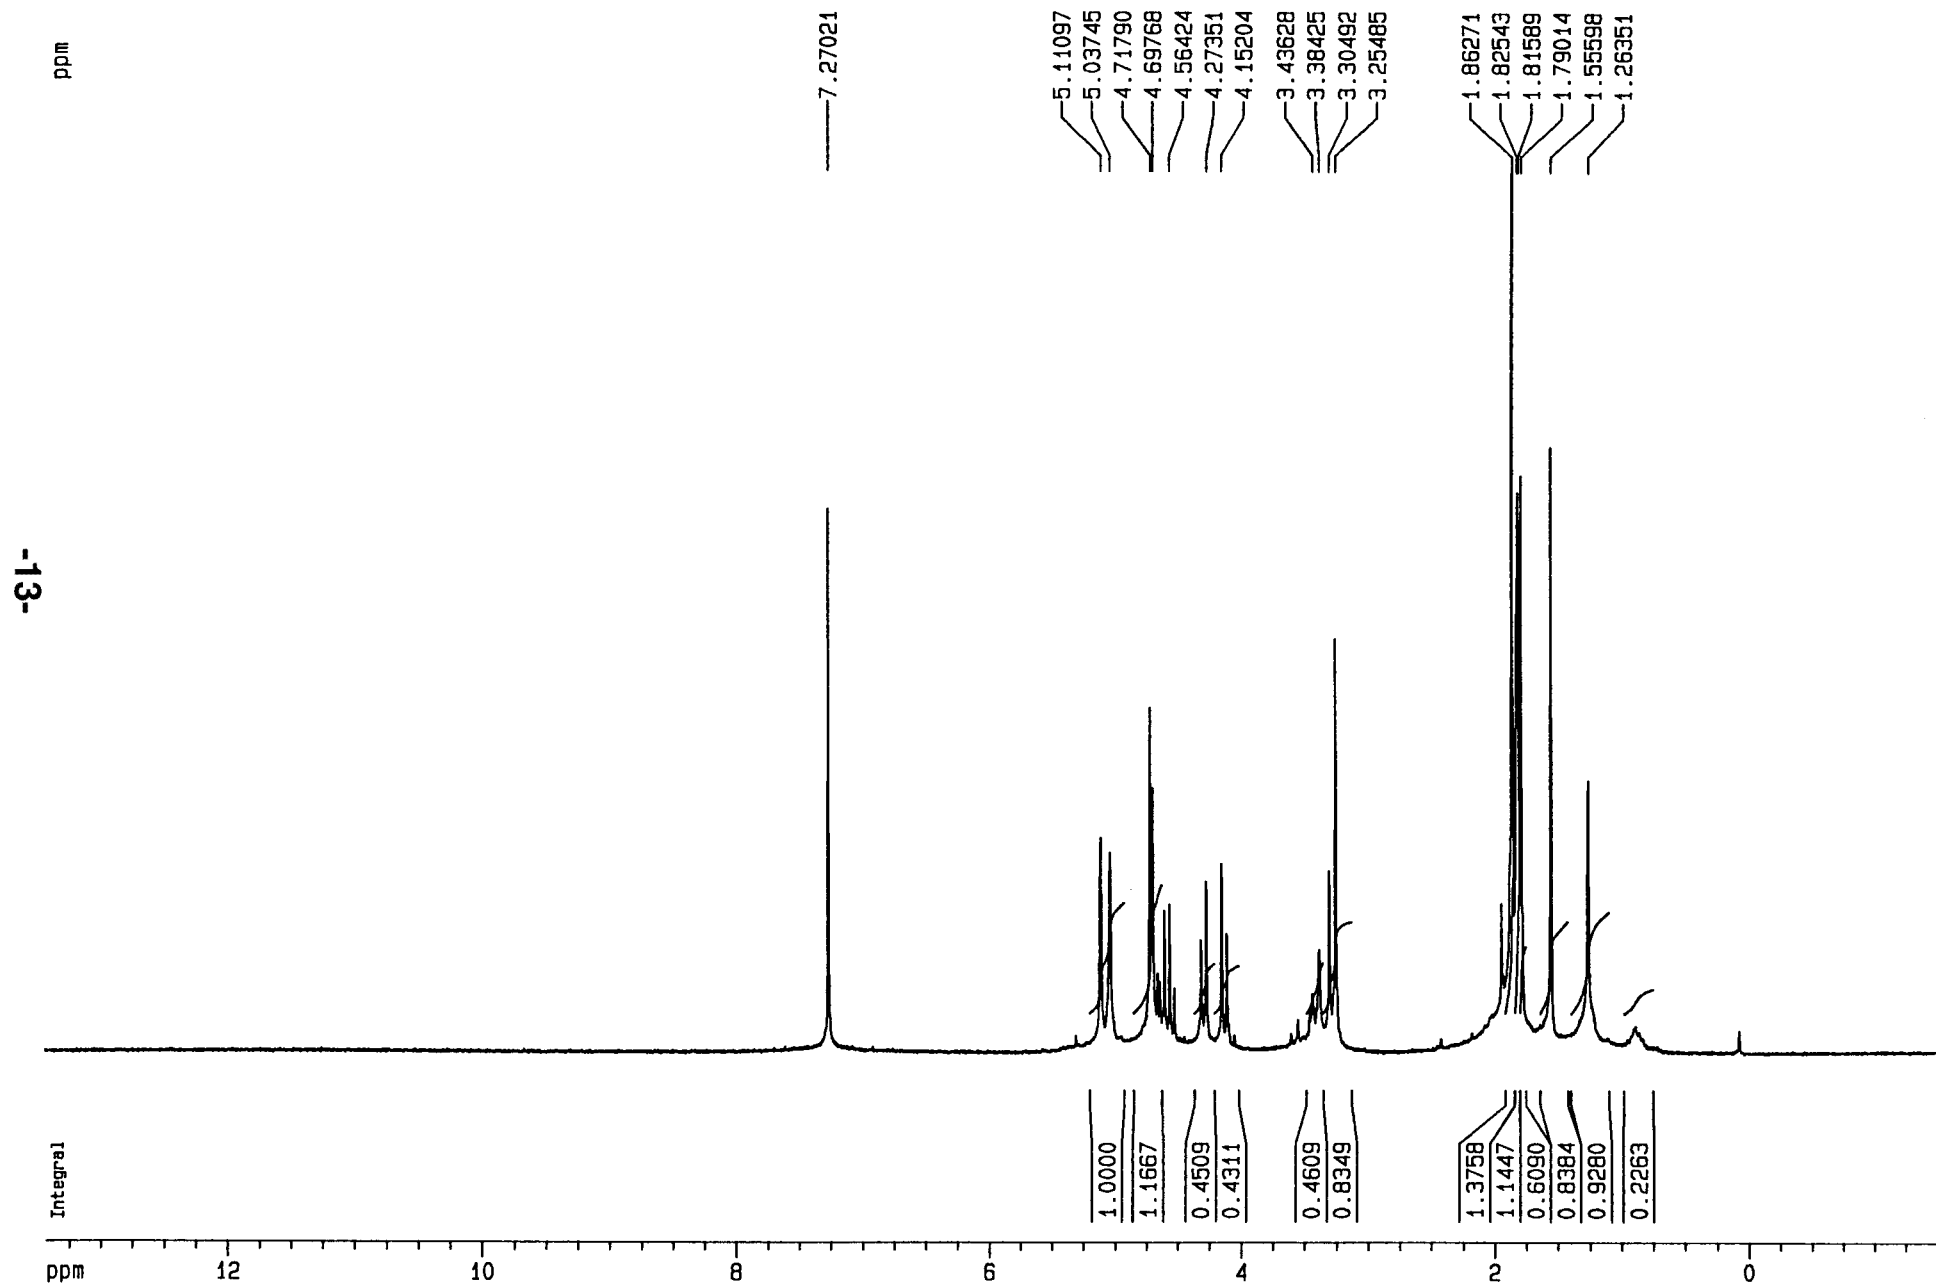

File:041406 Ident:13 Acq: 8-JUN-2004 13:49:31 +1:04 Cal:PFKJUN082004MS750\_1  
AutoSpecE EI+ Magnet BpI:8420936 TIC:146167568 Flags:HALL  
File Text:WANG/WIPF CW51B

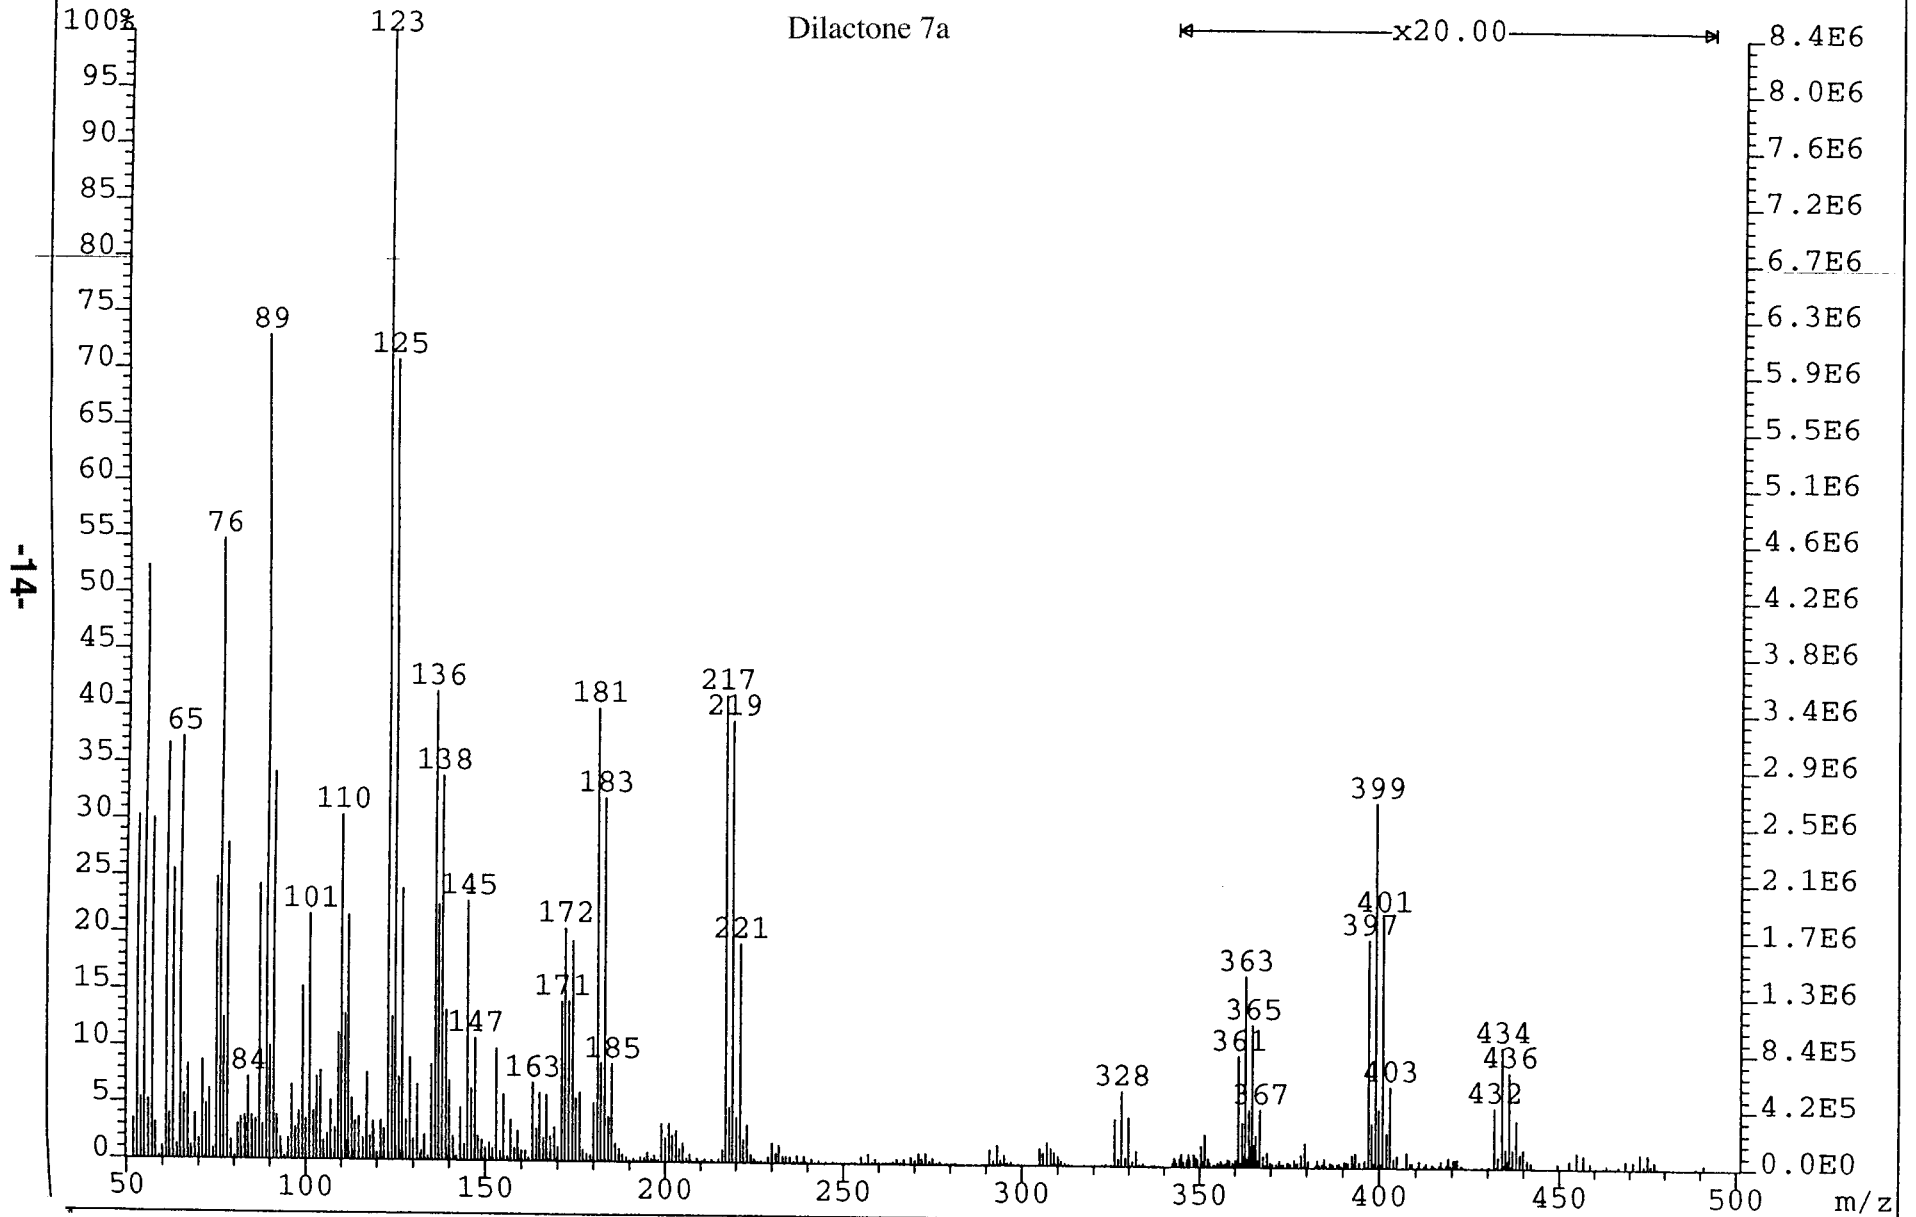

Chenbo 06-03-04 Cyclization of Allyl trichloroacetate 2nd pot 7b  
12-membered ring ~~11.8~~ Rf in CDCl3

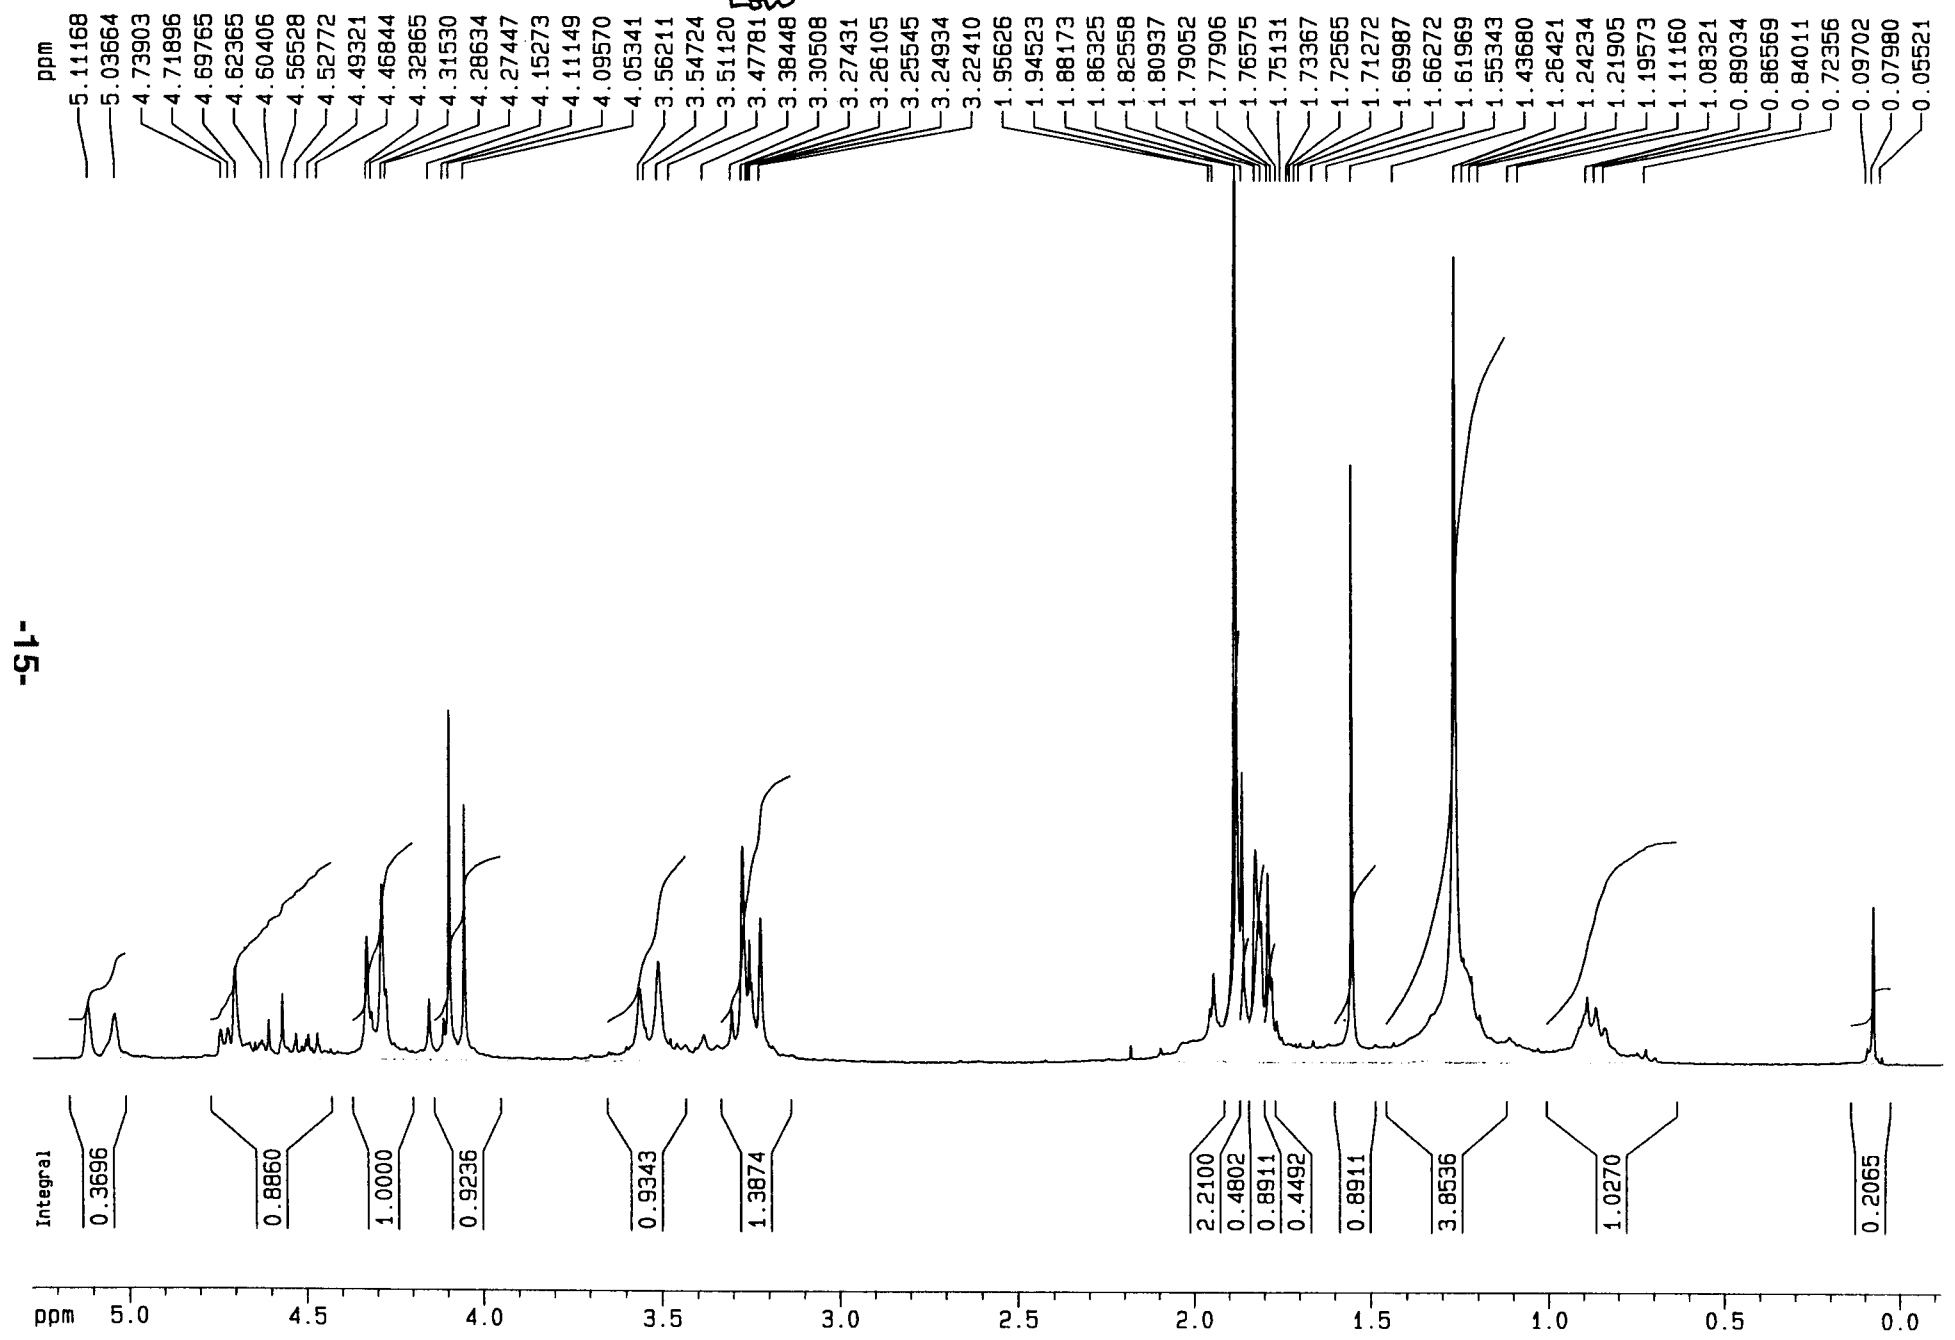

File:041405 Ident:14 Acq: 8-JUN-2004 14:05:07 +1:08 Cal:PFKJUN082004MS750\_1

AutoSpecE EI+ Magnet BpI:9700237 TIC:69216624 Flags:HALL

File Text:WANG/WIPF CW51A

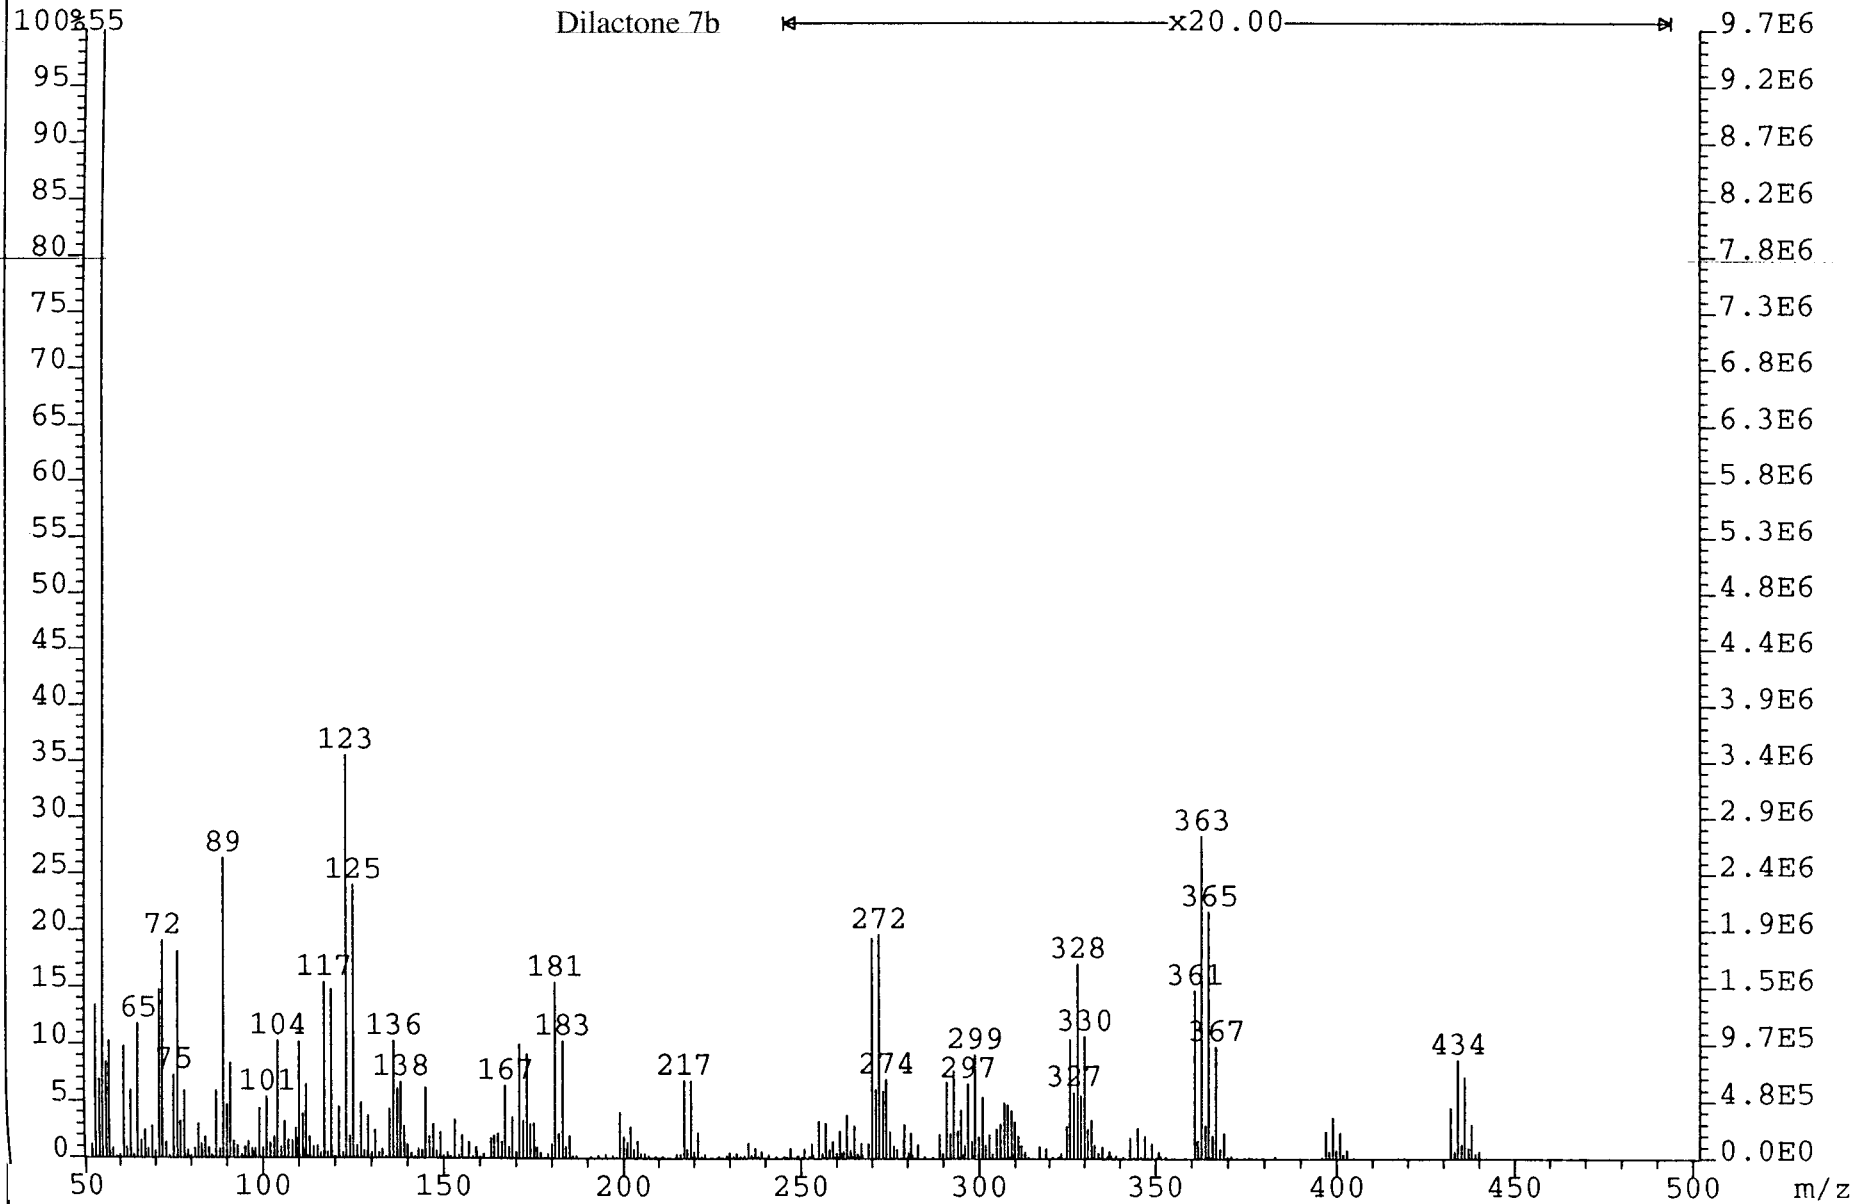

Supplement: b418256a.pdf [file b418256a.pdf]
